# Supplementary material for: Dihydroberberine alleviates Th17/Treg imbalance in premature ovarian insufficiency mice via inhibiting Rheb/mTOR signaling
Source: PubMed Central journal article supplement (PMC11523677; doi:10.1186/s10020-024-00971-z), 2024-10-29
Supplement: 10020_2024_971_MOESM1_ESM.pdf [file 10020_2024_971_MOESM1_ESM.pdf]

## ENGLISH EDITING CERTIFICATE

This document certifies that the manuscript listed below was edited for proper English language, grammar, punctuation, spelling, and overall style by one or more of the highly qualified native English speaking editors at Wiley Editing Services

### Manuscript title

Dihydroberberine restores the Th17/Treg cell balance in mice with premature ovarian insufficiency by inhibiting Rheb/mTOR signaling

### Authors

Disi Deng<sup>1,2</sup>, Yeke Wu<sup>3</sup>, Keming Wu<sup>1</sup>, Nan Zeng<sup>2\*</sup>, Wanjing Li<sup>4\*</sup>

### Order No

VJIYC\_1

### Date Issued

September 17, 2024

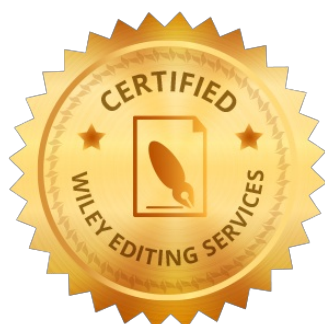

This document certifies that the manuscript listed above was edited for proper English language, grammar, punctuation, spelling, and overall style. Neither the research content nor the authors' intentions were altered in any way during the editing process. Documents receiving this certification should be English-ready for publication; however, the author has the ability to accept or reject our suggestions and changes. If you have any questions or concerns about this document or certification, please contact [help-cn@wileyeditingservices.com](mailto:help-cn@wileyeditingservices.com).

Publishing, visit <https://authorservices.wiley.com/>
